# Supplementary material for: Periscope Proteins are variable-length regulators of bacterial cell surface interactions
Source: PubMed Central journal article supplement (PMC8201768; doi:10.1073/pnas.2101349118), 2021-05-31
Supplement: pnas.2101349118.sapp.pdf [file pnas.2101349118.sapp.pdf]

This PDF file contains:

Figures S1 to S6

Tables S1 to S3

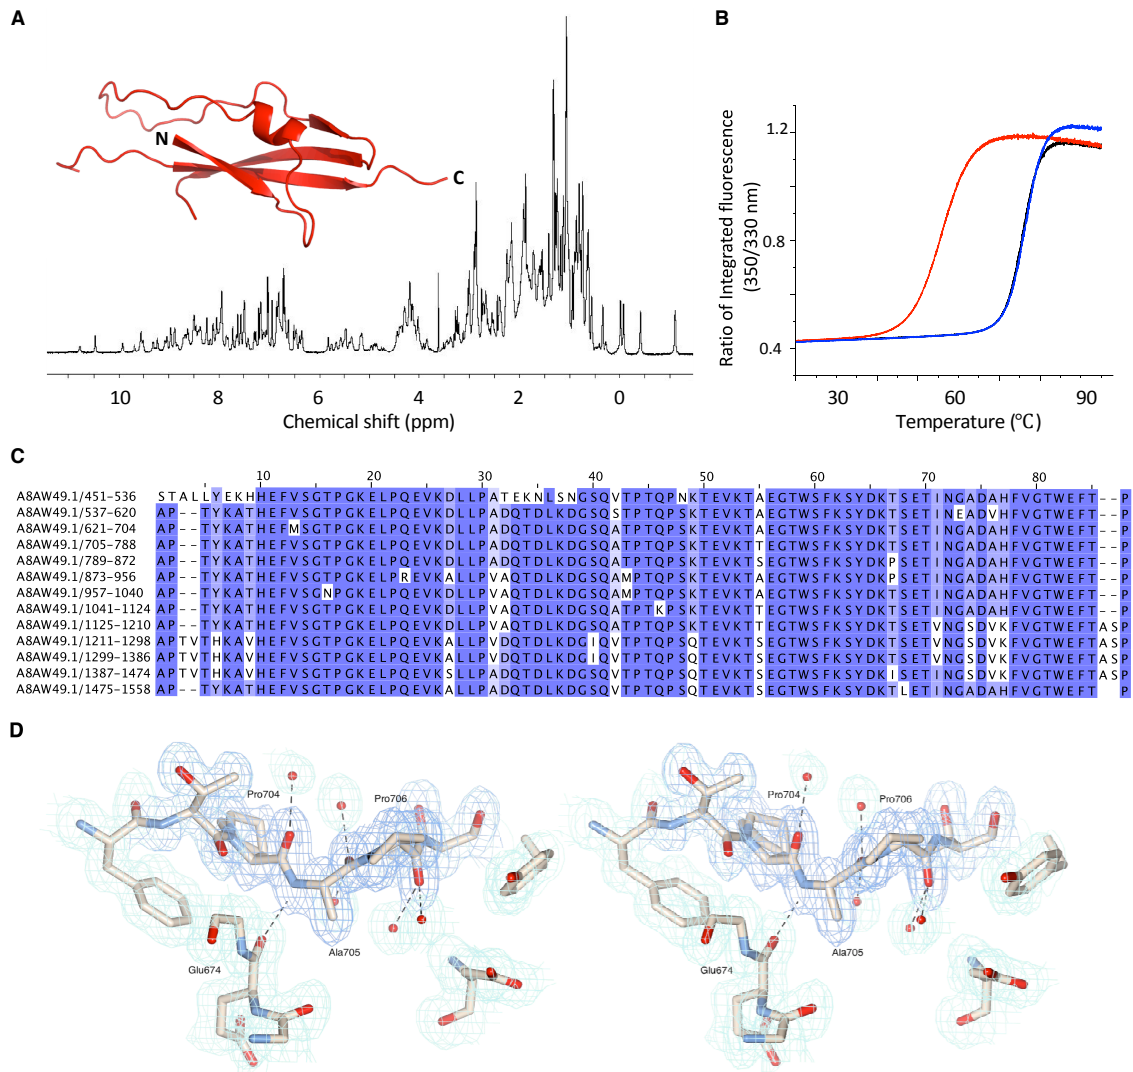

**Fig. S1. Defining the structural repeats of Sgo\_0707 from *Streptococcus gordonii*.**

(A) 1D  $^1\text{H}$  NMR spectrum of  $\Delta\text{N-Sgo\_R2}$ , structure of  $\Delta\text{N-Sgo\_R2}$  inset. (B)  $T_m$  values for  $\Delta\text{N-Sgo\_R2}$  (red), Sgo\_R3 (black) and Sgo\_R10 (blue) determined using nanoDSF. (C) sequence alignment of the 13 adjacent SHIRT domain repeats in Sgo\_0707 protein. (D) Stereo image of

Sgo\_R3-4 double repeat linker region Pro704-Ala705-Pro706 and flanking Thr703 and Thr707 (electron density  $2mF_o-DF_o$  map, blue chickenwire contoured at 0.1182 electrons/ $\text{\AA}^3$ ), illustrating that Ala705-Pro706 are solvent accessible with minimal contact with folded domains (hydrogen bonds, black dashed lines; water molecules, red spheres). Residues within 4  $\text{\AA}$  of the linker, and hydrogen bonded water molecules electron densities are rendered with cyan chickenwire contoured at 0.1182 electrons/ $\text{\AA}^3$ . Consistent with the inter-domain linker having similar rigidity to the flanking SHIRT domains, temperature (B-factors) do not vary significantly across this region of the structure (average protein B-factor 18  $\text{\AA}^2$ ; average B-factor linker residues 704—706 18.9  $\text{\AA}^2$ )

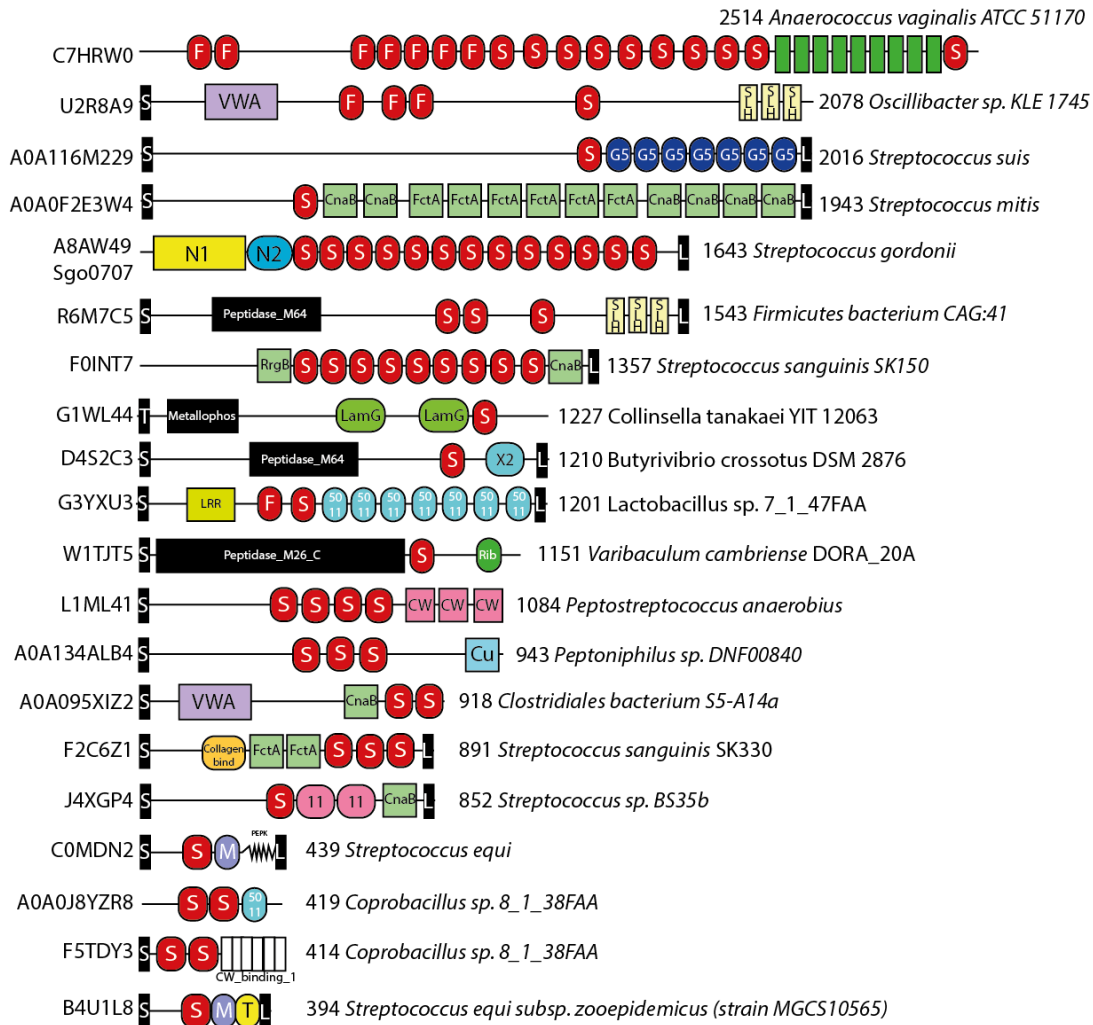

| Domain key |                           |  |                        |  |                      |
|------------|---------------------------|--|------------------------|--|----------------------|
|            | SHIRT domain PF17XXX      |  | Cna_B PF05738          |  | Rib/alpha PF08428    |
|            | Flg_new PF09479           |  | FctA PF12892           |  | G5 PF07501           |
|            | CW_binding_2 PF04122      |  | DUF11 PF01345          |  | TonB_N PF16031       |
|            | MucBP PF06458             |  | VWA PF00092            |  | SLH PF00395          |
|            | DUF5011 PF16403           |  | CBM_X2 PF03442         |  | SSSPR51 TIGR04308    |
|            | RrgB isopeptide TIGR04226 |  | Laminin_G3 PF03442     |  | CW_binding_1 PF01473 |
|            | Metallophos PF00149       |  | Cu_amin_oxidN1 PF07833 |  | LPXTG anchor PF00746 |
|            | Peptidase_M26_C PF07580   |  | LRR_5 PF13306          |  | Signal peptide       |
|            | Peptidase_M64 PF09471     |  | Collagen_bind PF05737  |  | TAT Signal peptide   |

Fig. S2. SHIRT domains are found in many other proteins, often in tandem array.

Each line in the figure shows a representative protein domain architecture containing SHIRT/S domains with UniProt accession number shown at the left. The domain architecture shows boxes and shapes (Domain key) representing various domains, repeats and motifs identified in the proteins using Pfam and TIGRfams. The N1 and N2 domains from Sgo\_0707 are included based on the known structure but are not represented within any domain database. Potential enzymatic domains are shown as the larger black boxes with white text, while the localization motifs are shown as small block boxes with a white letter to represent their type. At the end of each line the length of the protein is shown followed by the species and strain if known.



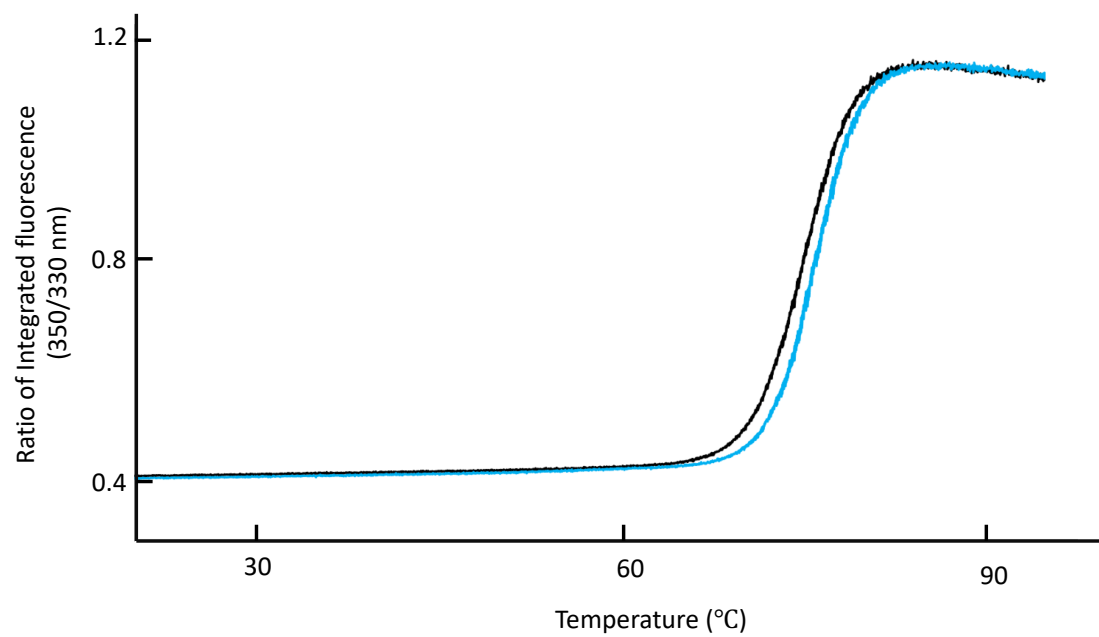

**Fig. S3. The interdomain interface in Sgo\_R3-4 is very limited.**

$T_m$  analysis using nanoDSF of Sgo\_R3 (black) compared with Sgo\_R3-4 (cyan).

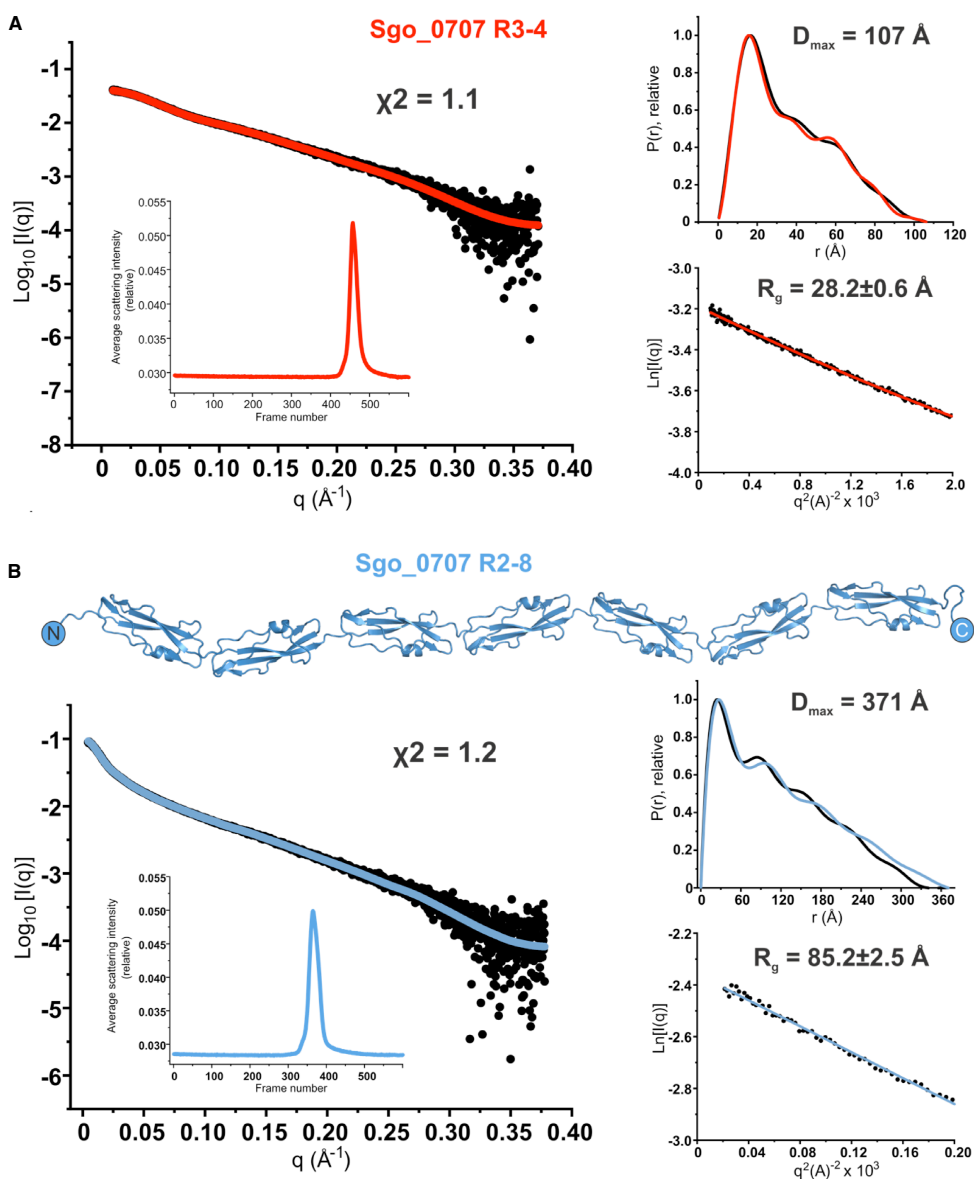

**Fig. S4. Validation of Sgo\_0707 R3-4 and Sgo\_0707 R2-8 models in solution via SAXS.**

(A) (Left) Fit of Sgo\_0707 R3-4 crystal structure (see Fig. 2A) to experimental scattering data. Experimental (black) and model (red) scattering curves are displayed to a maximum scattering angle of  $q = 0.378 \text{ \AA}^{-1}$ . Scattering data are accounted for by a single Sgo\_0707 R3-4 model, with fit value ( $\chi^2$ ) displayed. A trace of the in-line SEC run is displayed (inset). Normalised pair-distance distribution function (experimental – black, model – red) is displayed, with the derived maximum intra-particle distance ( $D_{\max}$ ) displayed (real space  $R_g = 30.1 \pm 0.1 \text{ \AA}$ ,  $I(0) = 0.04$ ) (top right). The

linear portion of the Guinier region confirms monodispersity ( $q^*R_g$  range = 0.4–1.2;  $I(0) = 0.04$ ) (bottom right). (B) Fit of Sgo\_0707 R2-8 model to experimental scattering data. A model for Sgo\_R2-8 was generated using iterative placement of the Sgo\_R3-4 crystal structure (top; see methods). Experimental (black) and model (blue) scattering curves are displayed to a maximum scattering angle of  $q = 0.368 \text{ \AA}^{-1}$  (left). Scattering data are accounted for by a single Sgo\_R2-8 model, with fit value displayed. A trace of the in-line SEC run is displayed (inset). Normalised pair-distance distribution function (experimental – black, model – blue) is displayed, with the calculated  $D_{\text{max}}$  displayed (real space  $R_g = 96.2 \pm 0.5 \text{ \AA}$ ,  $I(0) = 0.10$ ) (middle right). The Guinier region confirms monodispersity ( $q^*R_g$  range = 0.5–1.3;  $I(0) = 0.093$ ) (bottom right).

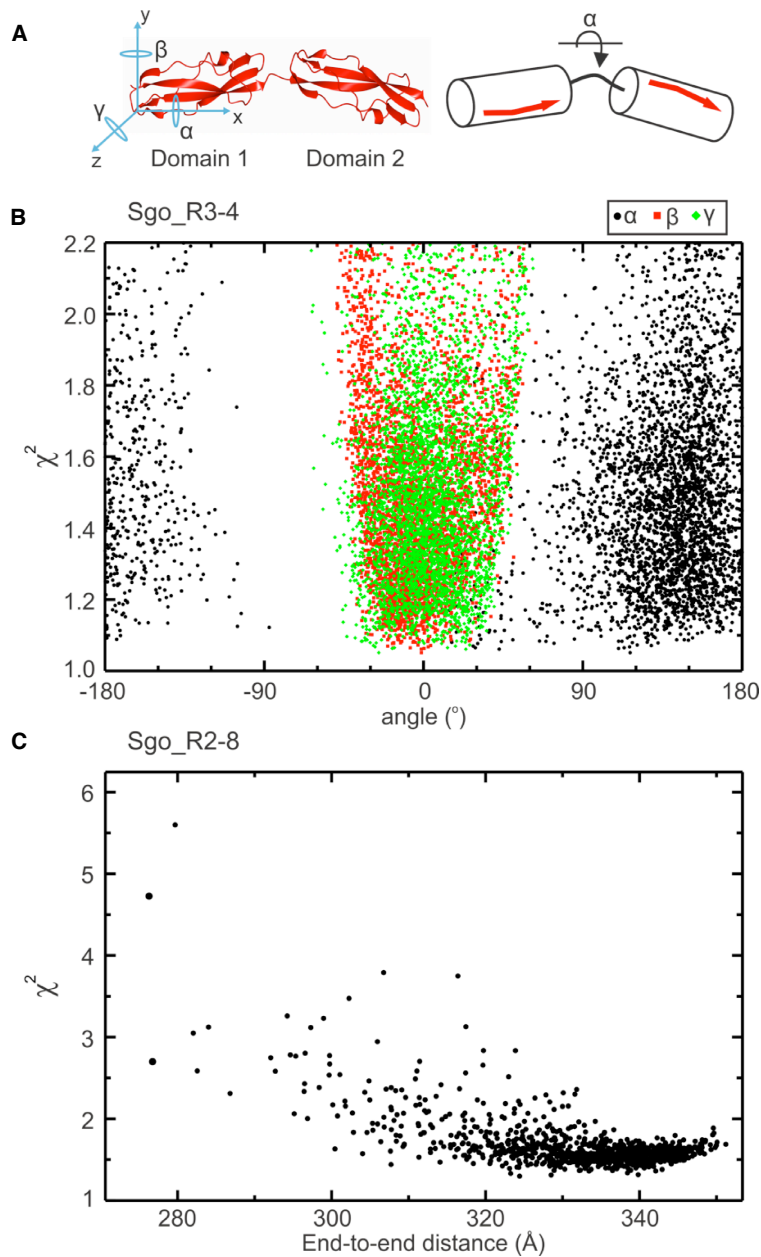

**Fig. S5. Elongation of Sgo\_0707 is dependent on rotation angle  $\alpha$ .**

(A) Definition of the three rotation angles ( $\alpha$ ,  $\beta$ ,  $\gamma$ ) between consecutive Sgo\_0707 domains, along the axes x-, y- and z- (left). Domains can rotate around angle  $\alpha$  to maintain elongation (right). (B) Fit of simulated Sgo\_R3-4 models with variation of all three angles  $\alpha$ ,  $\beta$ ,  $\gamma$  to experimental SAXS data. (C) Fit of simulated Sgo\_R2-8 models to experimental SAXS data. End-to-end distance is defined as in Fig. 3.

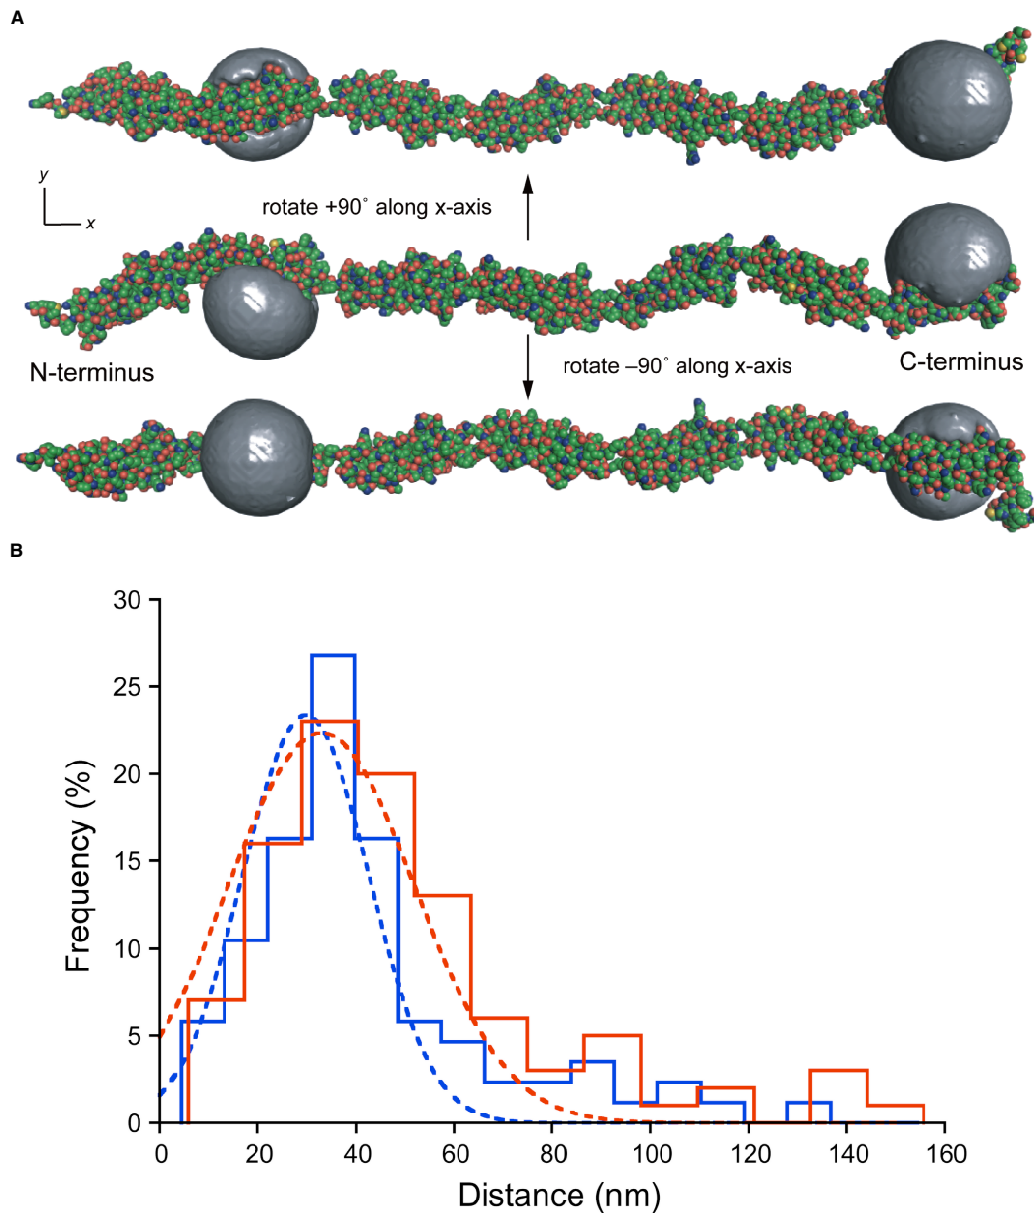

**Fig. S6. Determination of inter-dye distances using SHRIMP-TIRFM.**

(A) The structural schematics show the accessible volume (AV) for both Alexa Fluor 488 (AF488) dyes attached to Sgo\_R2-8<sup>S666C/S1086C</sup> via a C<sub>5</sub> linker at positions S666 and S1086. The N- and C-terminal ends of the Sgo\_R2-8<sup>S666C/S1086C</sup> construct are labelled. The SAXS-derived structural model (*SI Appendix*, Fig. S4B) was utilised to simulate the AVs (grey envelopes) as described in the Methods section using three radii to estimate the volume of the AF488 dye. In this structural

model, the distance between the dye attachment points ( $C_{\beta}$  atoms of S666 and S1086 residues) is 24.0 nm, and the predicted distance between the mean dye positions is 24.1 nm. Images were prepared using the PyMOL Molecular Graphics System (version 2.4.0, Schrödinger LLC). (B) SHRImP-TIRFM determination of the inter-dye distances for AF488-labelled Sgo\_R2-8<sup>S666C/S1086C</sup> immobilised on 2  $\mu\text{g}/\text{mL}$  (blue) or 20  $\mu\text{g}/\text{mL}$  (red) poly-D-lysine treated quartz surfaces in the presence of 100-fold molar excess of unlabelled blocking Sgo\_R2-8 protein. Colour-coded, dashed lines indicate Gaussian fits to the histograms for the 2  $\mu\text{g}/\text{mL}$  ( $n = 86$ ,  $R^2 = 0.92$ ) and 20  $\mu\text{g}/\text{mL}$  ( $n = 100$ ,  $R^2 = 0.94$ ) poly-D-lysine-treated quartz surfaces (mean  $\pm$  standard error =  $29.8 \pm 1.38$  nm and  $33.0 \pm 1.90$  nm, respectively).

Table S1: Primer sequences for SHIRT domain construct cloning and mutagenesis

| <b>Construct</b>       | <b>Primers</b>                                                                                                    |
|------------------------|-------------------------------------------------------------------------------------------------------------------|
| ΔN-Sgo_R2 (aa 544–627) | 5'- <u>TCCAGGGACCAGCAATGCATGAATTTGTGAGCGGCAC</u> -3' and 5'- <u>TGAGGAGAAGGCGCGTTAGGTGGCTTTGTAGGTCCG</u> -3'      |
| Sgo_R3 (aa 621–705)    | 5'- <u>TCCAGGGACCAGCAATGGCCCCGACCTACAAAGCCACC</u> -3' and 5'- <u>TGAGGAGAAGGCGCGTTAGGCCGGGGTAAATCCCAGGTGC</u> -3' |
| Sgo_R10 (aa 1211–1299) | 5'- <u>TCCAGGGACCAGCAATGGCTCCAACAGTGACTC</u> -3' and 5'- <u>TGAGGAGAAGGCGCGTTATTAAGCTGGGCTCGCTG</u> -3'           |
| Sgo_R3-4 (aa 621–789)  | <u>TCCAGGGACCAGCAATGGCCCCGACCTACAAAGCCACC</u> -3' and 5'- <u>TGAGGAGAAGGCGCGTTATGCCGGGGTGAATCCCAGGTAC</u> -3'     |
| Sgo_R2-8 S666C         | 5'-GACTCAACCTTGTA <del>AAA</del> ACAG-3' and 5'-CTGTTTTACAAGGTTGAGTC-3'                                           |
| Sgo_R2-8 S1086C        | 5'-GACAAAACCCTGTAAGACCG-3' and 5'-CGGTCTTACAGGTTTTTGTC-3'                                                         |

Table S2: Synthetic DNA sequences used in this study

|                                          |                                                                                                                                                                                                                                                                                                                                                                                                                                                                                                                                                                                                                                                                                                                                                                                                                                                                                                                                                                                                                                                                                                                                                                                                                                                                                                                                                                                                                                                                                                                                                                                                                                                                                                                                                                                                                                                                                                                                                                                                                                                                                                                                                                                                                                                                                                                                                                                                                                                                                                                                                                                                                                                                                                                                                                                                                                                                                                                                                                                                                                                                                                                                                                                                                                                                                                                                                                                                                                                                                                                                                                                                                                                                                                                                                                                            |
|------------------------------------------|--------------------------------------------------------------------------------------------------------------------------------------------------------------------------------------------------------------------------------------------------------------------------------------------------------------------------------------------------------------------------------------------------------------------------------------------------------------------------------------------------------------------------------------------------------------------------------------------------------------------------------------------------------------------------------------------------------------------------------------------------------------------------------------------------------------------------------------------------------------------------------------------------------------------------------------------------------------------------------------------------------------------------------------------------------------------------------------------------------------------------------------------------------------------------------------------------------------------------------------------------------------------------------------------------------------------------------------------------------------------------------------------------------------------------------------------------------------------------------------------------------------------------------------------------------------------------------------------------------------------------------------------------------------------------------------------------------------------------------------------------------------------------------------------------------------------------------------------------------------------------------------------------------------------------------------------------------------------------------------------------------------------------------------------------------------------------------------------------------------------------------------------------------------------------------------------------------------------------------------------------------------------------------------------------------------------------------------------------------------------------------------------------------------------------------------------------------------------------------------------------------------------------------------------------------------------------------------------------------------------------------------------------------------------------------------------------------------------------------------------------------------------------------------------------------------------------------------------------------------------------------------------------------------------------------------------------------------------------------------------------------------------------------------------------------------------------------------------------------------------------------------------------------------------------------------------------------------------------------------------------------------------------------------------------------------------------------------------------------------------------------------------------------------------------------------------------------------------------------------------------------------------------------------------------------------------------------------------------------------------------------------------------------------------------------------------------------------------------------------------------------------------------------------------|
| <p>Sgo_0707<br/>residues<br/>544–795</p> | <p>catgaat t t t g t g a g c g g c a c c c c g g g c a a g g a a c t g c c t c a g g a a g t g a a g g a c c t g c t g c c g<br/>g c c g a t c a a a c c g a t c t g a a g a c g g c a g t c a g a g c a c c c c g a c c c a g c c g a g t a a a a c c g a g<br/>g t g a a a a c c g c c g a a g g c a c c t g g a g c t t t a a g a g c t a c g a c a a g a c c a g c g a a a c c a t c a a c<br/>g a a g c c g a t g t g c a c t t t g t g g g t a c c t g g g a g t t c a c c c c g g c c c c g a c c t a c a a a g c c a c c<br/>c a t g a g t t c a t g a g c g g c a c a c c c g g t a a a g a a c t g c c t c a a g a g g t g a a g g a t c t g c t g c c t<br/>g c a g a t c a a a c c g a c c t g a a g g a t g g c a g t c a a g c a a g c a c c c c g a c a c a g c c g a g c a a a a c a g a a<br/>g t g a a g a c a g c c g a g g g c a c c t g g a g c t t c a a a a g c t a t g a c a a a a c c a g c g a g a c c a t t a a c<br/>g g c g c a g a t g c c a c t t t g t g g g c a c c t g g g a a t t a c c c c g g c c c c g a c a t a c a a g g c c a c c<br/>c a c g a g t t t g t g a g c g g t a c a c c g g g c a a a g a a c t g c c g c a g g a a g t t a a a g a t c t g c t g c c g<br/>g c c g a c c a g a c c g a c c t g a a a g a t g g t a g c c a g g c a a c c c c g a c c c a a c c g a g c a a g a c a g a a<br/>g t g a a a a c c a c c g a a g g c a c c t g g a g c t t c a a g a g t t a t g a t a a g a c c a g c g a a a c c a t t a a t<br/>g g c g c c g a t g c c a t t t t g t t g t a c c t g g g a a t t c a c c c c g g c a c c g a c c t a t a a g g c c a c c</p>                                                                                                                                                                                                                                                                                                                                                                                                                                                                                                                                                                                                                                                                                                                                                                                                                                                                                                                                                                                                                                                                                                                                                                                                                                                                                                                                                                                                                                                                                                                                                                                                                                                                                                                                                                                                                                                                                                                                                                                                                                                                                                                                                                         |
| <p>Sgo_R2-8</p>                          | <p>g c g c c a a c c t a c a a g g c a a c t c a c g a g t t t g t c a g c g g a a c t c c a g g a a a a g a a c t t c c a<br/>c a a g a a g t g a a g g a c c t g c t t c c a g c a g a c c a a a c a g a c t t g a a a g a t g g t a g t c a a t c g<br/>a c t c c a a c g c a a c c a a g t a a a a c c g a g g t t a a g a c a g c a g a a g g c a c a t g g a g c t t c a a g<br/>t c c t a t g a c a a g a c t t c c g a a a c c a t c a a t g a a g c a g a c g t a c a c t t c g t a g g a a c a t g g<br/>g a a t t c a c c c c a g c g c c a a c c t a c a a g g c g a c t c a t g a g t t t a t g a g t g g a a c c c c a g g t<br/>a a a g a g c t t c c a c a a g a a g t g a a g a c c t g c t t c c a g c a g a c c a a a c a g a c t t g a a a g a t<br/>g g a a g c c a a g c g a c t c c a a c t c a a c c a a g t a a a a c g g a a g t t a a g a c a g c a g a a g g c a c t<br/>t g g a g t t t c a a g t c a t a c g a c a a g a c t t c t g a a a c c a t t a a t g g c g c g g a c g c a c a c t t c<br/>g t a g g c a c a t g g g a a t t c a c c c c a g c g c c a a c c t a c a a g g c g a c t c a t g a g t t t g t g a g t<br/>g g a a c c c c a g g t a a a g a g c t t c c a c a a g a a g t g a a a g a c c t g c t t c c a g c a g a c c a a a c a<br/>g a c t t g a a a g a t g g a a g t c a a g c c a c t c c a a c g c a a c c a a g t a a a a c g g a a g t g a a g a c g<br/>a c a g a a g g t a c t t g g a g t t t c a a g t c a t a c g a c a a g a c t t c t g a a a c c a t t a a t g g c g c g<br/>g a c g c a c a c t t c g t a g g c a c a t g g g a a t t c a c c c c a g c g c c a a c c t a c a a g g c g a c t c a a<br/>g a g t t t g t g a g t g g a a c c c a g g t a a a g a g c t t c c a c a a g a a g t g a a a g a c t g c t t c c a<br/>g c a g a c c a a c a g a c t t g a a a g a t g g a a g c c a a g c g a c t c c a a c a c a a c c a a g t a a a a c g<br/>g a a g t t a a g a c g t c a g a a g g c a c t t g g a g c t t c a a g t c c t a t g a c a a g c c g t c t g a a a c c<br/>a t c a a t g g a g c a g a c g c a c a c t t c g t a g g c a c c t g g g a a t t c a c c c c a g c g c c a a c c t a c<br/>a a g g c g a c a c a c g a g t t t g t c a g c g g a a c t c c a g g c a a a g a g c t t c c a c g a g a a g t a a a a<br/>g c a c t g c t t c c a g t a g c t c a a a c a g a c t t g a a a g a t g g t a g c c a a g c g a t g c c a a c g c a a<br/>c c a a g t a a a a c a g a g g t t a a g a c a g c a g a a g g c a c t t g g a g c t t c a a g t c c t a t g a c a a g<br/>c c g t c t g a a a c c a t c a a t g g a g c a g a c g c a c a c t t t g t c g g t a c t t g g g a a t t a c c c c a<br/>g c a c c a a c c t a c a a g g c a a c a c a c g a g t t t g t g a g t g g a a t c c a g g t a a a g a g c t t c c a<br/>c a a g a a g t a a a a g a t c t g c t t c c a g t a g c t c a a a c a g a c t t g a a a g a t g g t a g t c a a g c g<br/>a t g c c a a c g c a a c c a a g t a a a a c g g a a g t t a a g a c a g c a g a a g g t a c t t g g a g t t t c a a a<br/>t c a t a c g a t a a g a c t t c c g a a a c c a t c a a t g g a g c a g a c g c a c a c t t t g t a g g a a c a t g g<br/>g a a t t c a c c c c a g c g c c a a c c t a c a a g g c g a c a c a c g a g t t t g t c a g c g g a a c t c c a g g c<br/>a a a g a g c t t c c a c a a g a a g t a a a a g a t c t g c t t c c a g t a g c t c a a a c a g a c t t g a a a g a t<br/>g g t a g c c a a g c a a c a c c a a c a a a a c c a a g t a a a a c g g a a g t g a a g a c a a c t g a a g g c a c t<br/>t g g a g t t t c a a t c a t a c g a t a a g a c t t c c g a a a c c a t c a a t g g a g c a g a c g c a c a c t t t<br/>g t a g g a a c a t g g g a a t t c a c c c c a g c g</p> |
| <p>Sgo_R10</p>                           | <p>g c t c c a a c a g t g a c t c a t a a a g c a g t t c a c g a a t t t g t g a g t g g a a c t c c a g g c a a a g a g<br/>c t t c c a c a a g a a g t g a a a g c c t g c t t c c a g t a g a t c a a a c a g a t c t g a a a g a t g g c a t t<br/>c a a g t g a c t c c a a c a c a a c c a a g t c a a a c a g a g g t t a a g a c a t c a g a a g g c a c a t g g a g c<br/>t t c a a g t c a t a c g a t a a g a c t t c a g a g a c t g t c a a c g g t t c a g a t g t t a a g t t t g t a g g a<br/>a c a t g g g a a t t t a c a g c g a g c c c a g c t t a a</p>                                                                                                                                                                                                                                                                                                                                                                                                                                                                                                                                                                                                                                                                                                                                                                                                                                                                                                                                                                                                                                                                                                                                                                                                                                                                                                                                                                                                                                                                                                                                                                                                                                                                                                                                                                                                                                                                                                                                                                                                                                                                                                                                                                                                                                                                                                                                                                                                                                                                                                                                                                                                                                                                                                                                                                                                                                                                                                                                                                                                                                                                                                                                                                                                           |



Table S3: Inter-domain linker and domain repeat termini orientation for a subset of 11 Periscope proteins. Columns indicate, from left to right: protein name, UniProt identifier, Pfam identifier of the domain repeat, inter-domain linker sequence or sequences if multiple linkers are observed (comma separated), PDB identifier of the domain repeat structure, Pfam identifier of the domain structure (asterisk indicates the use of a similar domain from the same Pfam clan), distance between the N- and C-termini of the domain structure, and angle between the N- and C-termini of the domain structure. The structure of the CshA\_repeat (PDB: 6SZC) has not been used due to its incomplete N-terminus.

| Protein     | UniProt    | Domain repeat | Inter-domain linker            | PDB  | Domain  | NC-distance (Å) | NC-angle (rad) |
|-------------|------------|---------------|--------------------------------|------|---------|-----------------|----------------|
| SasG        | Q2G2B2     | G5-E          | GP, GG                         | 3TIQ | G5      | 70.54           | 2.24           |
|             |            |               |                                | 3TIQ | SasG_E  | 40.63           | 2.59           |
| SAP077A_019 | D2JAN8     | Big_6         | TTA                            | 2YN5 | Big_13* | 36.93           | 2.57           |
| Rib R4      | P72362     | Rib           | DPR                            | 6S5X | Rib     | 39.27           | 2.10           |
| Sgo_0707    | A8AW49     | SHIRT         | TPAPT, TASPAPTVT               | 7AVK | SHIRT   | 42.86           | 3.01           |
| CshA        | A0A0F2D244 | CshA_repeat   | STE, RPE, TPT                  |      |         |                 |                |
| CdrA        | A0A485CMM4 | MBG_2         | PAQ, KAL                       | 4NG0 | MBG*    | 39.06           | 3.09           |
| E0F69_00680 | A0A5S4TIX9 | MucBP         | ARQPLG, KQAQPLG                | 2KT7 | MucBP   | 29.03           | 2.98           |
| Spa         | M4MB15     | B             | QAPKA                          | 4NPF | B       | 31.70           | 1.70           |
| Spg         | A0A4V0F6C4 | GA-like       | ESAKKARISEATDGLSDF<br>LKSQTPAE | 2J5Y | GA-like | 35.27           | 2.86           |
| LytD        | A0A2X2YDI6 | SH3_3         | TQTPEKPSTPESTEKGTG             | 2KT8 | SH3_3   | 7.39            | 0.94           |
| Autolysin   | P37710     | LysM          | GNTGGSGSGGSNNN                 | 2MKX | LysM    | 5.01            | 0.60           |

Other supplementary materials for this manuscript include the following:

**Dataset S1.** Table of Periscope proteins identified from the NCTC3000 dataset. Columns names stand for: cluster identifiers (clustid), recognisable name from gene names and other literature references or UNK for unknown name (name), number of proteins in the cluster (size), minimum number of repeats (minrep), maximum number of repeats (maxrep), length of the repeat (replen), average percentage of protein sequence identity of repeats (psim), average percentage of DNA sequence identity of repeats (psim.dna), closest UniProt protein (uniprotid), Pfam families in the protein (pfam), name of Pfam families of the repeating sequence (pfam.rep.name), Pfam accession numbers in the repeating sequence (pfam.rep.acc), NCTC3000 species where the protein was found (species), and GO terms for location (GO\_location), function (GO\_function) and process (GO\_process).
